# Supplementary material for: Enhanced cycling performance of nanostructure LiFePO4/C composites with in situ 3D conductive networks for high power Li-ion batteries
Source: Royal Society of Chemistry journal article supplement (doi:10.1039/c8ra09124b), 2018-01-01
Supplement: c8ra09124b1.pdf [file c8ra09124b1.pdf]

# **Enhanced cycling performance of nanostructure LiFePO<sub>4</sub>/C composites with *in-situ* 3D conductive networks for high power Li-ion batteries**

Chunsong Zhao <sup>a</sup>, Lu-Ning Wang <sup>a, b, \*</sup>, Jitao Chen <sup>c, \*</sup>, Min Gao <sup>d</sup>

<sup>a</sup> *Beijing Advanced Innovation Center for Materials Genome Engineering, School of  
Materials Science and Engineering, University of Science and Technology Beijing,  
Beijing 100083, China*

<sup>b</sup> *State Key Laboratory For Advanced Metals and Materials, Beijing 100083, China*

<sup>c</sup> *College of Chemistry and Molecular Engineering, Peking University, Beijing 100871,  
China*

<sup>d</sup> *China Automotive Battery Research Institute Co., Ltd., Beijing 100088, China*

\*Corresponding author.

E-mail: [luning.wang@ustb.edu.cn](mailto:luning.wang@ustb.edu.cn) (L.W.), [chenjitao@pku.edu.cn](mailto:chenjitao@pku.edu.cn) (C.J.)

Tel: 86-1062334488;

Fax: 86-1062332506.

The SEM and TEM images of LFP-S and LFP/C-S were measured in Fig.S1

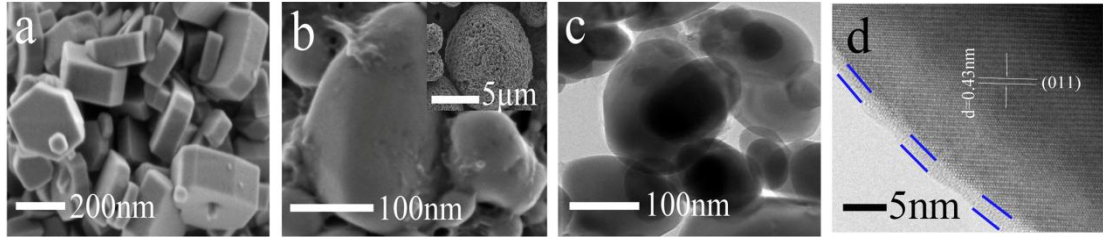

**Fig.S1.** SEM images for (a) LFP-S and (b) LFP/C-S, TEM images for (c, d) LFP/C-S

The  $\text{Li}^+$  diffusion coefficient at open circuit state could be calculated from the slanted lines in the Warburg region by Eq. 1: [1]

$$D_{Li} = R^2 T^2 / 2A n^2 F^2 C_0 \sigma^2 \quad (1)$$

where  $D_{Li}$  is the diffusion coefficient in  $\text{LiFePO}_4$  ( $\text{cm}^2 \text{s}^{-1}$ ),  $R$  is the gas constant ( $8.31 \text{ J mol}^{-1} \text{ K}^{-1}$ ),  $T$  is the absolute temperature (298 K),  $A$  is the surface area of active material,  $n$  is the number of electrons transferred per molecule during the electrochemical reaction,  $F$  is the Faraday constant ( $96485 \text{ C mol}^{-1}$ ),  $C_0$  is the molar concentration of lithium ion in  $\text{LiFePO}_4$  ( $1.1 \times 10^{-2} \text{ mol cm}^{-3}$  here), and  $\sigma$  is the Warburg factor associated with  $Z_{re}$  by Equation 2: [1]

$$Z_{re} = K + \sigma \omega^{-1/2} \quad (2)$$

The Warburg factor can be obtained from the slope between  $Z_{re}$  and the  $\omega^{-1/2}$  where  $D_{Li}$  is the  $\text{Li}^+$  diffusion coefficient in LFP ( $\text{cm}^2 \cdot \text{s}^{-1}$ ),  $\sigma$  is the Warburg factor associated with  $Z_{Re}$  ( $Z_{Re} \propto \sigma \omega^{-1/2}$ ). After linear fitting the relation plot between  $Z_{Re}$  and the reciprocal square root of the angular frequency  $\omega$ , as shown in Figure S2, the  $\sigma$  of LFP/C-F and LFP/C-S were calculated to be  $14.276$  and  $24.01 \text{ } \Omega \cdot \text{s}^{-1/2}$ , respectively.

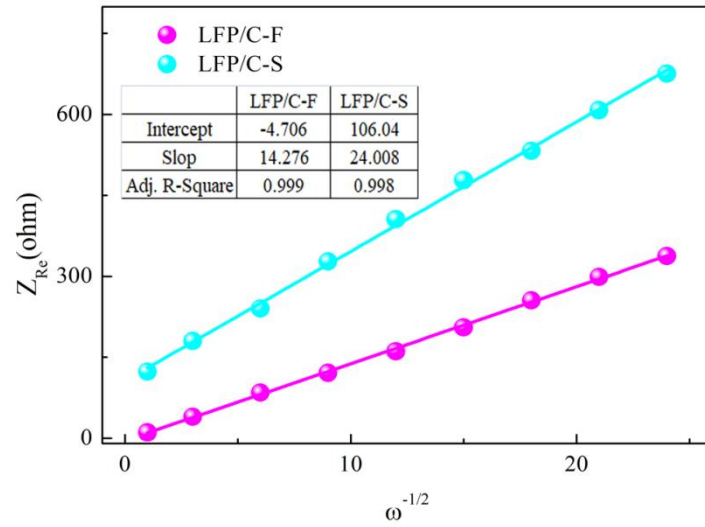

**Fig.S2.** the relationship between  $Z_{re}$  and the  $\omega^{-1/2}$  of  $\text{LiFePO}_4/\text{C}$  composites

### Reference

- [1] B. Wang, B. Xu, T. Liu, P. Liu, C. Guo, S. Wang, Q. Wang, Z. Xiong, D. Wang, X. S.Zhao, *Nanoscale* **2014**, *6*, 986.
